# Supplementary material for: CKR-L3, a deletion version CCR6-isoform shows coreceptor-activity for limited human and simian immunodeficiency viruses
Source: PubMed Central journal article supplement (PMC4089560; doi:10.1186/1471-2334-14-354), 2014-07-01
Supplement: 1471-2334-14-354-S1.pdf [file 1471-2334-14-354-S1.pdf]

Additional file 1: Alignment of the nucleotide sequences of the C2-V3 regions of HIV-2MIR  
 ones propagated through CCR5, CKR-L3 and CCR6 coreceptors respectively

|               |                                                                           |    |    |    |    |    |    |      |
|---------------|---------------------------------------------------------------------------|----|----|----|----|----|----|------|
|               | 10                                                                        | 20 | 30 | 40 | 50 | 60 | 70 |      |
|               |                                                                           |    |    |    |    |    |    |      |
| <i>CCR5</i>   | gataagcactattgggatgatatgaggtttagatactgggcaccaccgggttatgccttgctaagatgca    |    |    |    |    |    |    |      |
| <i>CKR-L3</i> | .....t.....                                                               |    |    |    |    |    |    |      |
| <i>CCR6</i>   | .....t.....g.....                                                         |    |    |    |    |    |    |      |
|               |                                                                           |    |    |    |    |    |    |      |
| <i>CCR5</i>   | atgataccaagtattcaggctttgagcccaattgttctaaagtagtagctactacatgcactaggatgat    |    |    |    |    |    |    | -140 |
| <i>CKR-L3</i> | .....c.....                                                               |    |    |    |    |    |    |      |
| <i>CCR6</i>   | .....t.....                                                               |    |    |    |    |    |    |      |
|               |                                                                           |    |    |    |    |    |    |      |
| <i>CCR5</i>   | ggaaacgcaaacttctacgtgggtttggctttaatggcacaagagcagagaaatagaacatataatctattgg |    |    |    |    |    |    | -210 |
| <i>CKR-L3</i> | .....a.....g.....                                                         |    |    |    |    |    |    |      |
| <i>CCR6</i>   | .....g.....                                                               |    |    |    |    |    |    |      |
|               |                                                                           |    |    |    |    |    |    |      |
| <i>CCR5</i>   | catggtaaagataacagaactatcatcagcttaaacaaatattataatctcagcttgattgtaagaggc     |    |    |    |    |    |    | -280 |
| <i>CKR-L3</i> | .....g.....                                                               |    |    |    |    |    |    |      |
| <i>CCR6</i>   | .....g.....                                                               |    |    |    |    |    |    |      |
|               |                                                                           |    |    |    |    |    |    |      |
|               | -----V3 Region-----                                                       |    |    |    |    |    |    |      |
| <i>CCR5</i>   | caggaaataaaacagtgggtgccaataacacttctttcaggattagtgtttcactcccagccaatcaatac   |    |    |    |    |    |    | -350 |
| <i>CKR-L3</i> | .g.....a.....c.....g.....                                                 |    |    |    |    |    |    |      |
| <i>CCR6</i>   | .g.....a.....c.....g.....                                                 |    |    |    |    |    |    |      |
|               |                                                                           |    |    |    |    |    |    |      |
| <i>CCR5</i>   | aagacctaacaagcatg                                                         |    |    |    |    |    |    | -368 |
| <i>CKR-L3</i> | .....                                                                     |    |    |    |    |    |    |      |
| <i>CCR6</i>   | .....                                                                     |    |    |    |    |    |    |      |
