# Supplementary material for: CKR-L3, a deletion version CCR6-isoform shows coreceptor-activity for limited human and simian immunodeficiency viruses
Source: PubMed Central journal article supplement (PMC4089560; doi:10.1186/1471-2334-14-354), 2014-07-01
Supplement: 1471-2334-14-354-S2.pdf [file 1471-2334-14-354-S2.pdf]

Additional file 2: Alignment of the nucleotide sequences of the V1-V3 regions of SIV-smE660 clones propagated through CCR5, CKR-L3 and CCR6 coreceptors respectively

|        |                                                                         |    |        |                |    |    |    |     |
|--------|-------------------------------------------------------------------------|----|--------|----------------|----|----|----|-----|
|        | 10                                                                      | 20 | 30     | 40             | 50 | 60 | 70 |     |
|        |                                                                         |    | π----- | V1 Region----- |    |    |    |     |
| CCR5   | attgcaatgagatgtaataaaactgagacagataggtggggttgacaagaacgcagggacaacaaca     |    |        |                |    |    |    |     |
| CKR-L3 | .....g.....                                                             |    |        |                |    |    |    |     |
| CCR6   | .....g.....a.....                                                       |    |        |                |    |    |    |     |
|        | -----π                                                                  |    |        |                |    |    |    |     |
| CCR5   | catcaacaacaacaacagcagcaacaccaagtgtggcagaaaatgttataaatgaaagtaatccttgtat  |    |        |                |    |    |    | 140 |
| CKR-L3 | .....gt.....a.....a.....                                                |    |        |                |    |    |    |     |
| CCR6   | .....a.....                                                             |    |        |                |    |    |    |     |
|        | π-----                                                                  |    |        |                |    |    |    |     |
|        | V2 Region-----                                                          |    |        |                |    |    |    |     |
| CCR5   | aaaaaataataattgtgcaggcttggaacaggagcccatgataggttgtaaatttaacatgacagggtta  |    |        |                |    |    |    | 210 |
| CKR-L3 | .....                                                                   |    |        |                |    |    |    |     |
| CCR6   | .....c.....                                                             |    |        |                |    |    |    |     |
|        | -----π                                                                  |    |        |                |    |    |    |     |
| CCR5   | aaaagggacaaaaggatagaatataatgaaacatgggtattcaagagatttaatctgtgagcagtcagcga |    |        |                |    |    |    | 280 |
| CKR-L3 | .....a.....                                                             |    |        |                |    |    |    |     |
| CCR6   | .....                                                                   |    |        |                |    |    |    |     |
| CCR5   | atggaagtgagagtagatgttacatgcatcattgtaacaccagtgttattcaggaatcctgtgacaagca  |    |        |                |    |    |    | 350 |
| CKR-L3 | ...a.....a.....                                                         |    |        |                |    |    |    |     |
| CCR6   | ...a.....a.....a.....                                                   |    |        |                |    |    |    |     |
| CCR5   | ttattgggatgccattagatttagatattgtgcaccgccaggttatgctttgcttaggtgtaatgattca  |    |        |                |    |    |    | 420 |
| CKR-L3 | .....t.....                                                             |    |        |                |    |    |    |     |
| CCR6   | .....t.....                                                             |    |        |                |    |    |    |     |
| CCR5   | aattattcaggctttgctcctaactgttctaaggtagtggttcttcatgcacaagaatgatggagacgc   |    |        |                |    |    |    | 490 |
| CKR-L3 | .....c.....a.....                                                       |    |        |                |    |    |    |     |
| CCR6   | .....                                                                   |    |        |                |    |    |    |     |
| CCR5   | aaacctctacttggttggttcaatgggtactagggcagaaaatagaacatacatttattggcatggcaa   |    |        |                |    |    |    | 560 |
| CKR-L3 | .....                                                                   |    |        |                |    |    |    |     |
| CCR6   | .....a.....                                                             |    |        |                |    |    |    |     |
|        | π-----                                                                  |    |        |                |    |    |    |     |
| CCR5   | aagtaatagaaccataattagcttaataagtattataatctaacaatgagatgtagaagaccaggaaat   |    |        |                |    |    |    | 630 |
| CKR-L3 | .....                                                                   |    |        |                |    |    |    |     |
| CCR6   | .....                                                                   |    |        |                |    |    |    |     |
|        | -----                                                                   |    |        |                |    |    |    |     |
|        | V3 Region-----                                                          |    |        |                |    |    |    |     |
| CCR5   | aagacagttttaccagtcaccattatgtcagggttggtcttccattcgcaaccataaatgagagaccaa   |    |        |                |    |    |    | 700 |
| CKR-L3 | .....                                                                   |    |        |                |    |    |    |     |
| CCR6   | .....                                                                   |    |        |                |    |    |    |     |
|        | -----                                                                   |    |        |                |    |    |    |     |
| CCR5   | aacaggcctggtgctggtttggaggaagctggaaagaggccatccaggaagtgaaggaaaccttgggtcaa |    |        |                |    |    |    | 770 |
| CKR-L3 | .....                                                                   |    |        |                |    |    |    |     |
| CCR6   | .....                                                                   |    |        |                |    |    |    |     |
| CCR5   | tca-773                                                                 |    |        |                |    |    |    |     |
| CKR-L3 | ...                                                                     |    |        |                |    |    |    |     |
| CCR6   | ...                                                                     |    |        |                |    |    |    |     |
